# Supplementary material for: Efficacy and Safety Outcomes of Cataract Surgery in Survivors of Ebola Virus Disease: 12-Month Results From the PREVAIL VII Study
Source: PubMed Central journal article supplement — Transl Vis Sci Technol. 2021 Jan 25;10(1):32. doi: 10.1167/tvst.10.1.32 (PMC7838547; doi:10.1167/tvst.10.1.32), 2021-01-25
Supplement: tvst-10-1-32_s001.pdf [file tvst-10-1-32_s001.pdf]

**Supplementary Table 1.** Postoperative Intraretinal Fluid Cysts and Anterior Chamber Cell Following Cataract Surgery by History of Uveitis in the Operative Eye. Approximately a quarter of eyes undergoing cataract surgery demonstrated evidence of postoperative cystoid macular edema, with no association apparent based on history of uveitis.

|                                                      | Non-uveitic<br>(N=19 eyes) | Uveitic<br>(N=15 eyes) | Uveitic vs<br>Non-uveitic <i>p</i> -value |
|------------------------------------------------------|----------------------------|------------------------|-------------------------------------------|
| <b>Postoperative intraretinal fluid cysts</b>        |                            |                        |                                           |
| N (%)                                                | 4 (21.1%)                  | 4 (26.7%)              | 0.9                                       |
| <b>Anterior Chamber Cells ≥ Grade 1 (6-15 cells)</b> |                            |                        |                                           |
| Month 1                                              | 10 (52.6%)                 | 10 (66.7%)             |                                           |
| Month 3                                              | 6 (31.6%)                  | 7 (46.7%)              |                                           |
| Month 6                                              | 5 (27.8%)                  | 1 (7.7%)               | 0.428                                     |
| Month 9                                              | 4 (22.2%)                  | 3 (23.1%)              |                                           |
| Month 12                                             | 0 (0%)                     | 0 (0%)                 |                                           |
