# Supplementary material for: Efficacy and Safety Outcomes of Cataract Surgery in Survivors of Ebola Virus Disease: 12-Month Results From the PREVAIL VII Study
Source: PubMed Central journal article supplement — Transl Vis Sci Technol. 2021 Jan 25;10(1):32. doi: 10.1167/tvst.10.1.32 (PMC7838547; doi:10.1167/tvst.10.1.32), 2021-01-25
Supplement: tvst-10-1-32_s002.pdf [file tvst-10-1-32_s002.pdf]

**Supplementary Table 2.** Postoperative intraretinal fluid cysts and anterior chamber cells following cataract surgery by occurrence of intraoperative complications. Intraretinal fluid and post-operative inflammation did not appear to be associated with the presence of intraoperative complications. Approximately one quarter of participants demonstrated evidence of intraretinal fluid and a slight majority of participants had mild or greater inflammation in the anterior chamber at one month or beyond.

|                                                      | No intraoperative complications<br>(N=26 eyes) | Intraoperative complications<br>(N=8 eyes) | <i>p</i> -value |
|------------------------------------------------------|------------------------------------------------|--------------------------------------------|-----------------|
| <b>Postoperative intraretinal fluid cysts</b>        |                                                |                                            |                 |
| N (%)                                                | 6 (23.1%)                                      | 2 (25%)                                    | 1               |
| <b>Anterior Chamber Cells ≥ Grade 1 (6-15 cells)</b> |                                                |                                            |                 |
| Month 1                                              | 15 (57.7%)                                     | 5 (62.5%)                                  |                 |
| Month 3                                              | 10 (38.5%)                                     | 3 (37.5%)                                  |                 |
| Month 6                                              | 4 (16.7%)                                      | 2 (28.6%)                                  | 0.709           |
| Month 9                                              | 5 (20.8%)                                      | 2 (28.6%)                                  |                 |
| Month 12                                             | 0 (0%)                                         | 0 (0%)                                     |                 |
